# Supplementary material for: Bifunctional covalent bromine: an advanced redox mediator for rechargeable lithium–oxygen batteries
Source: Royal Society of Chemistry journal article supplement (doi:10.1039/d2cc05118d), 2022-01-01
Supplement: d2cc05118d1.pdf [file d2cc05118d1.pdf]

## Supplementary Materials

### **Bifunctional covalent bromine: an advanced redox mediator for rechargeable lithium-oxygen batteries**

Chu-Yue Li <sup>a</sup>, Min-Sheng Wu <sup>a</sup>, Wei-Rong Chen <sup>a</sup>, Yuan-Jia Rong <sup>a</sup>, Qian-Yan Wang <sup>a</sup>, Xiao-Ping Zhang <sup>a\*</sup>

*a School of Electrical Engineering, Southwest Jiaotong University, Chengdu, 610031, China*

*\*E-mail: [zxp@swjtu.edu.cn](mailto:zxp@swjtu.edu.cn)*

## **Experimental Section<sup>1-3</sup>**

### **MWCNT cathode**

MWCNT (XFNANO, 8-15nm), single layer graphene and polyvinylidene fluoride (PVDF) were mixed with weight ratio of 8:1:1 in N- methyl- 2- pyrrolidone (NMP). The mixture was ultrasonicated for 30 minutes followed by magnetic stirring for 24 hours. And then, the slurry was casted onto the round- shape carbon paper with a diameter of 11 mm and a thickness of ~0.2 mm and vacuum dried at 80 °C for 24 hours. The loading weight of the cathode was ~0.1mg. The loading area was ~0.25 cm<sup>2</sup>.

### **Li anode**

The Li foil of thickness 0.2 mm was cut into 15.6 mm diameter discs.

### **Cu foil**

A 0.2 mm thick Cu foil was cut into a disc of 11.0 mm in diameter.

### **Assembling Li-O<sub>2</sub> coin cell**

Two-electrode system cells were assembled using CR2032-type coin cells with hole for O<sub>2</sub> channel in an Ar-filled glove box (O<sub>2</sub> and H<sub>2</sub>O < 0.01 ppm). The lithium-oxygen batteries were assembled with MWCNT cathode, Waterman GF/A glass fiber separators and lithium metal anodes. The amount of 1.0 M lithium bis(trifluoromethane sulfonyl)imide/ Methyl

sulfoxide (LiTFSI/ DMSO) electrolyte in a coin cell is  $\sim 120 \mu\text{L}$ . 100 mM lithium bromide (LiBr, Adamas, 99.99%) or Trimethylbromosilane ( $\text{C}_3\text{H}_9\text{BrSi}$ , Sigma-Aldrich, 97%) is added as redox mediators. After assembly, the Li-O<sub>2</sub> batteries are transferred into a glass test chamber inflated with 1.0 m bar of high-purity O<sub>2</sub> and rest for 3h.

### **Assembling Li | Li symmetric batteries and Li | Cu batteries**

Symmetric Li | Li metal batteries are assembled using CR2032-type coin cells using the Li foil as working electrodes, Waterman GF/C as separator. The amount of 1.0 M lithium hexafluorophosphate/ ethylene carbonate / dimethyl carbonate (LiPF<sub>6</sub>/EC/DMC) electrolyte in a coin cell was  $\sim 70 \mu\text{L}$ .

Li | Cu batteries were assembled using CR2025-type coin cells. The amount of 1.0 M Lithium hexafluorophosphate/ ethylene carbonate / dimethyl carbonate (LiPF<sub>6</sub>/EC/DMC) electrolyte in a coin cell was  $\sim 70 \mu\text{L}$ . 100 mM lithium bromide (LiBr) or Trimethylbromosilane ( $\text{C}_3\text{H}_9\text{BrSi}$ ) is added as redox mediators in both Li | Li symmetric batteries and Li | Cu batteries.

### **Electrochemical analysis**

**Galvanostatic discharging/ charging curve** tests are using the LAND electrochemical testing system.

**Cyclic voltammetry (CV) measurement** is tested using Bio-logic VSP in the voltage range of 2.0-4.2 V at a scan rate of 0.1 mV/s.

**Electrochemical Impedance Spectroscopy (EIS)** is performed using Gamry Interface 5000 E with a voltage amplitude of 10 mV and a frequency range of  $10^6$  to  $10^{-1}$ .

### **Characterization**

Lithium-oxygen batteries after cycling, are disassembled in the argon-filled glove box. Then, the anodes were washed in 1,2-Diethoxyethane (DME) for 30 min, and dried for 2 h.

**The X-ray diffraction (XRD) measurements** were used to characterize the LiOH on the pristine lithium anode on a Rigaku Ultima IV advanced diffractometer with Cu  $K\alpha$  radiation.

**Field emission scanning electron microscopy (SEM)** was used to observe the microstructure of the lithium anodes on Apreo 2C.

**Fourier transform infrared spectroscopy (FTIR)** was performed using a Bruker Scientific spectrometer (TENSOR II) from 4000 to  $400\text{ cm}^{-1}$ .

**The X-ray photoelectron spectroscopy (XPS)** results were obtained on a Thermo Fisher ESCALAB Xi+ spectrometer with a monochromatic Al  $K\alpha$  X-ray source.

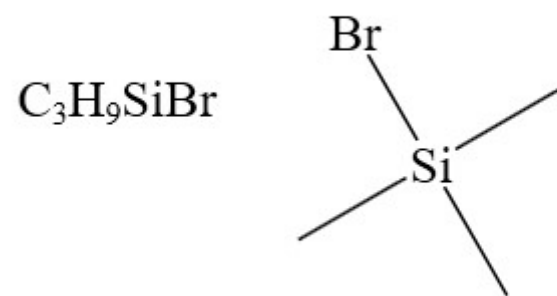

**Fig S1.** The structural formula of Trimethylbromosilane.

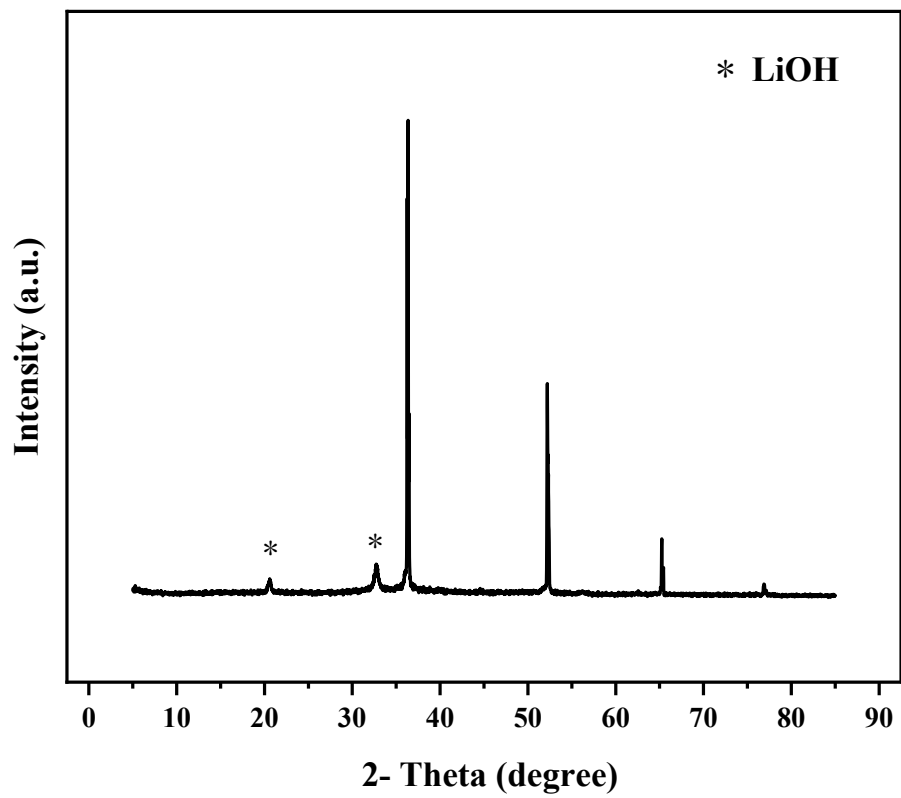

**Fig. S2** XRD patterns of the pristine lithium anode.

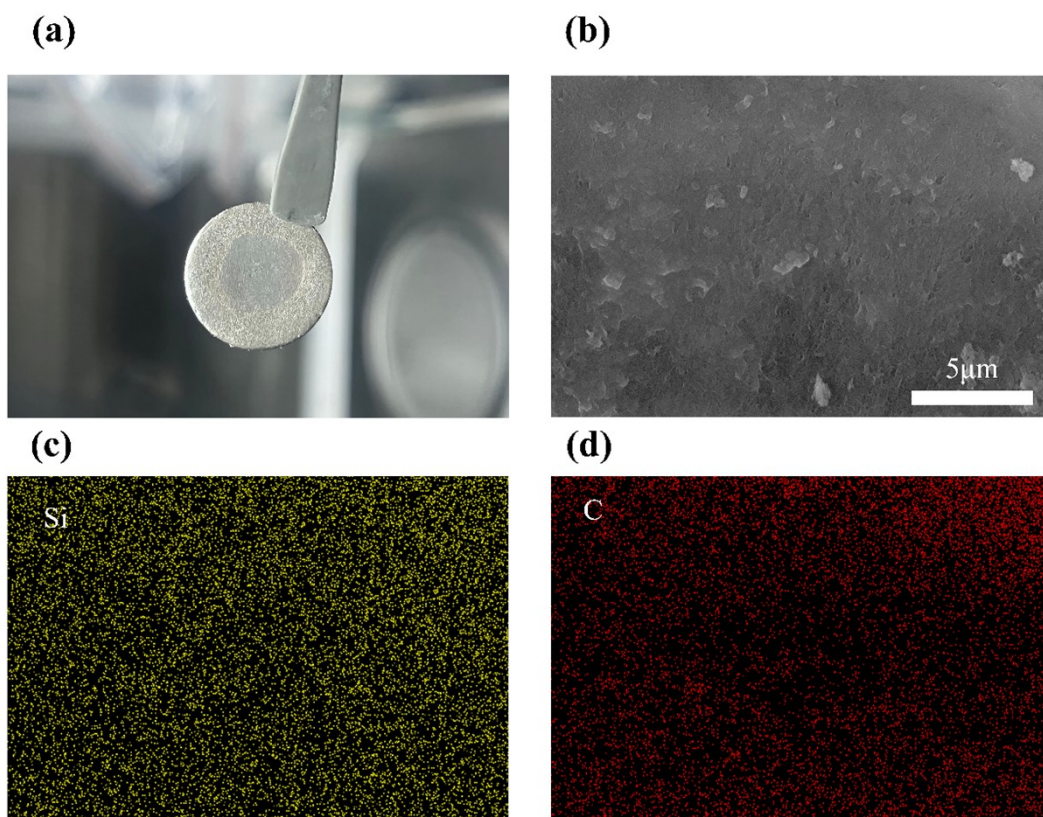

**Fig. S3** (a) The digital photograph (b) SEM images of lithium metal dropping with 20  $\mu\text{l}$   $\text{C}_3\text{H}_9\text{SiBr}$ . Energy dispersive spectroscopy (EDS) images of the top-view of the  $\text{C}_3\text{H}_9\text{SiBr}$  containing anode. (c) EDS spectra of Si (d) EDS spectra of C.

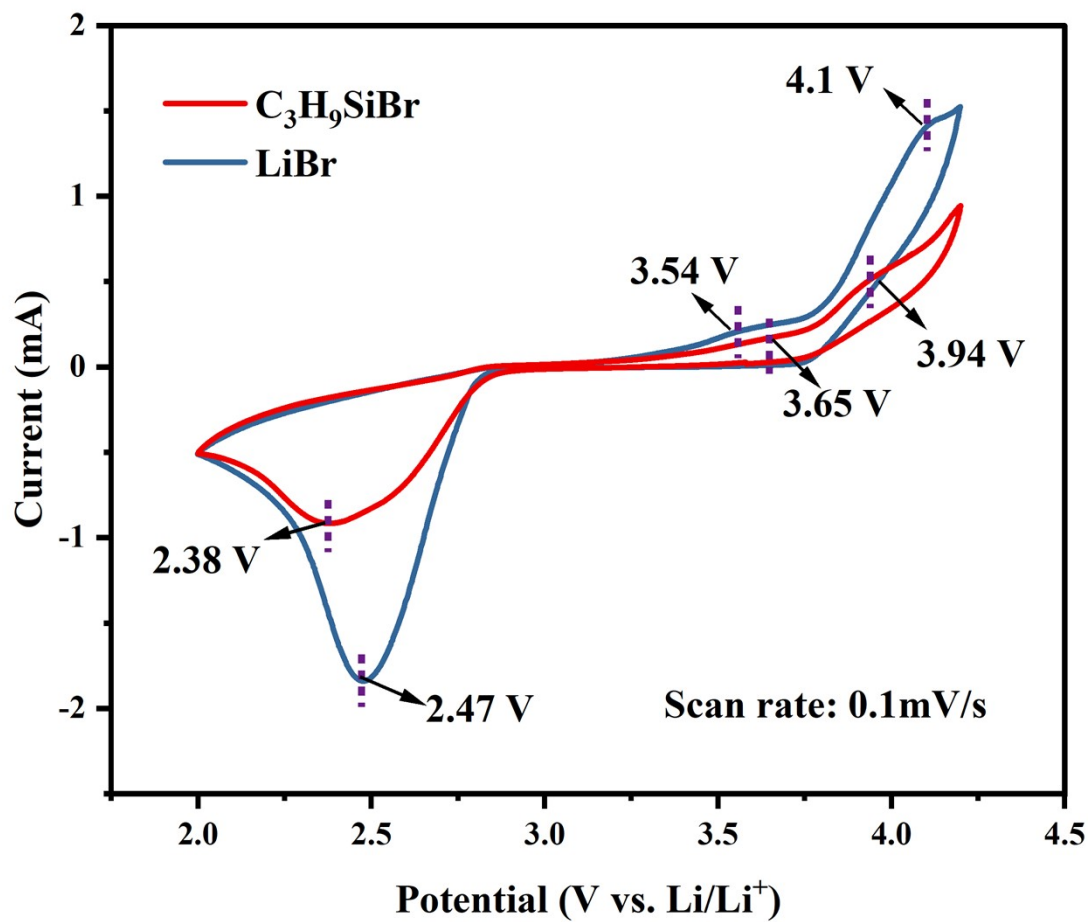

**Fig. S4** Cyclic voltammogram (CV) curves of the lithium-oxygen batteries with C<sub>3</sub>H<sub>9</sub>SiBr or LiBr additive. The scan rate is 0.1 mV/s.



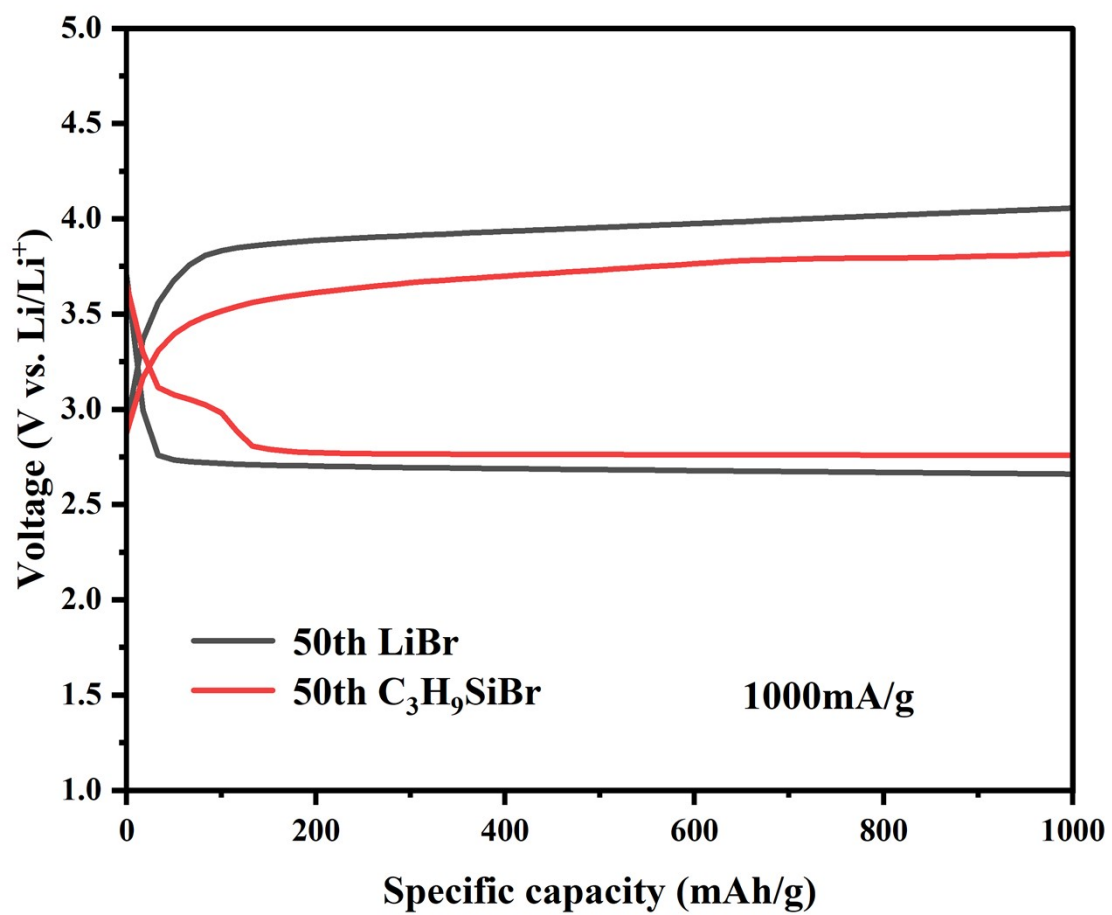

Fig. S5 Galvanostatic discharge/charge curves of the 50th cycle at 1000 mA/g.

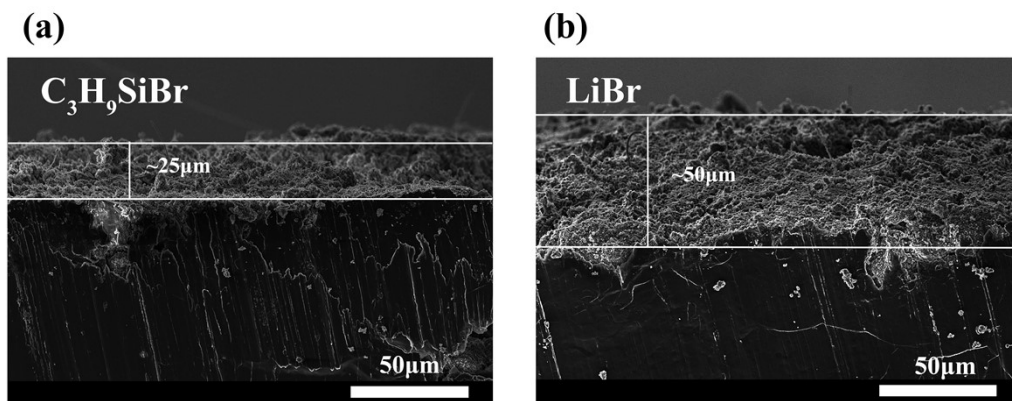

**Fig. S6** Cross-section SEM images of lithium metal anodes after 30 cycles tested under a current density of 1000 mAh/g and a current at 1000 mA/ (a)  $C_3H_9SiBr$ -containing lithium metal anodes (b) LiBr-containing lithium metal anodes.

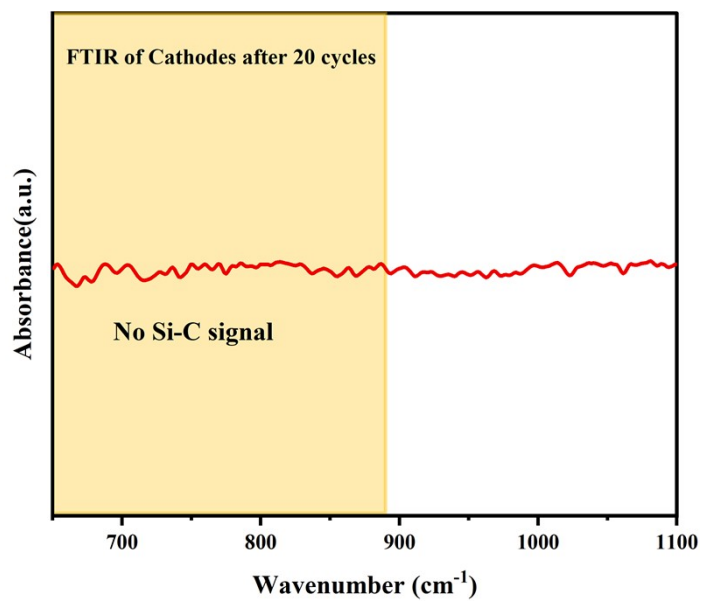

**Fig. S7** FTIR spectra for the cathode in the C<sub>3</sub>H<sub>9</sub>SiBr-containing lithium-oxygen battery after 20 cycles.

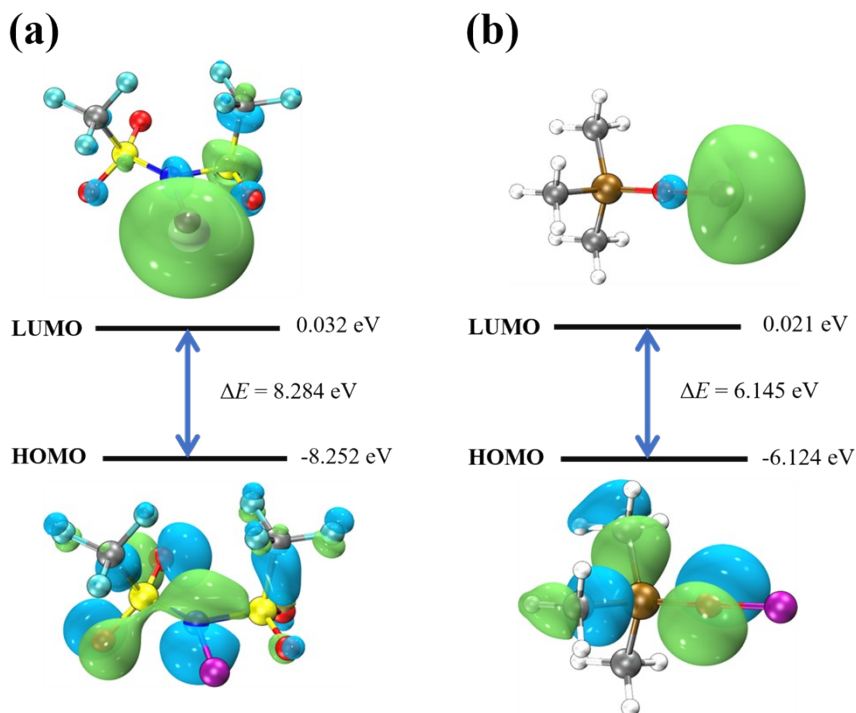

**Fig. S8** LUMO and HOMO levels of (a)LiTFSI (b)C<sub>3</sub>H<sub>9</sub>SiOLi.

The theoretical calculations were performed via the Gaussian 16 suite of programs. The structures of two studied molecules were fully optimized at the B3LYP-D3BJ/6-31G(d) level of theory. The solvent (DMSO) effect was included in the calculations using the solvation model based on the density (SMD) model. The vibrational frequencies of the optimized structures were carried out at the same level. The structures were characterized as a local energy minimum on the potential energy surface by verifying that all the vibrational frequencies were real. The molecular orbital levels of studied compounds were investigated via theoretical calculations, including the highest occupied molecular orbital (HOMO) and the lowest unoccupied molecular orbital (LUMO). The Visual Molecular Dynamics (VMD) program was used to plot the color-filled iso-surface graphs to visualize the molecular orbitals.

FTIR and XPS are used to prove the existence of C<sub>3</sub>H<sub>9</sub>SiOLi on the surface of lithium metal anodes, which means C<sub>3</sub>H<sub>9</sub>SiOLi do not react with lithium metal during cycling. In order to evaluate the stability of SEI components quantitatively, calculations were conducted on the molecular orbital energies for the electron affinity and the chemical

reactivity of SEI components. As the LUMO level of  $C_3H_9SiOLi$  is lower than  $LiTFSI$ , which indicates that  $C_3H_9SiOLi$  is easier than  $LiTFSI$  to react with lithium metal during cycling. Now that we have proved  $C_3H_9SiOLi$  do not react with lithium metal during cycling, which means  $LiTFSI$  do not react with lithium metal either. These results can prove the stability of lithium-oxygen battery systems.

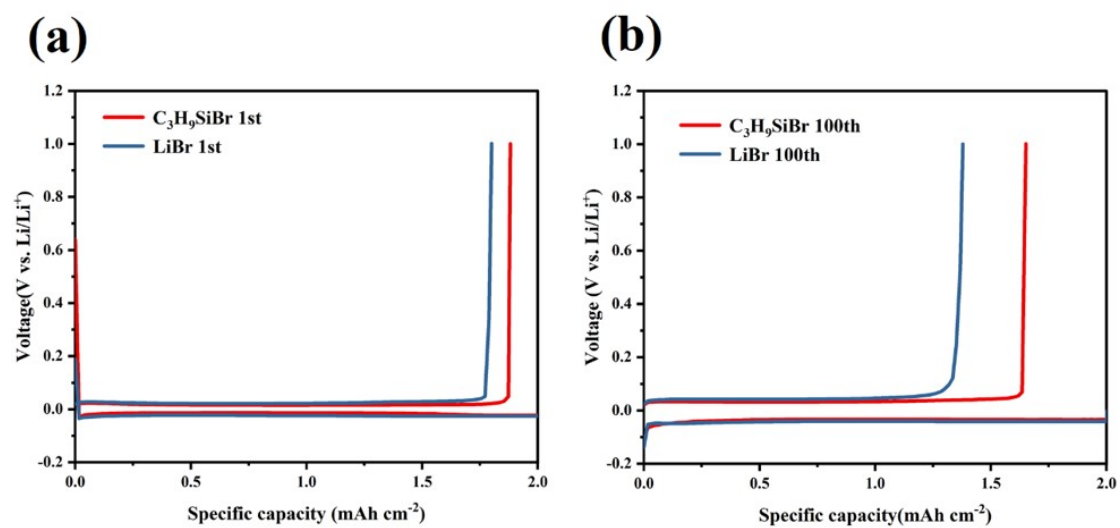

**Fig. S9** Electrochemical performance of Li | Cu batteries. The electrodes are stripped/plated at a current density of 1 mA cm<sup>-2</sup> with a fixed capacity of 2 mA h cm<sup>-2</sup>. Galvanostatic discharge/charge profiles with 100 mM C<sub>3</sub>H<sub>9</sub>SiBr or LiBr additive at 1st cycle (a) 100th cycle (b).

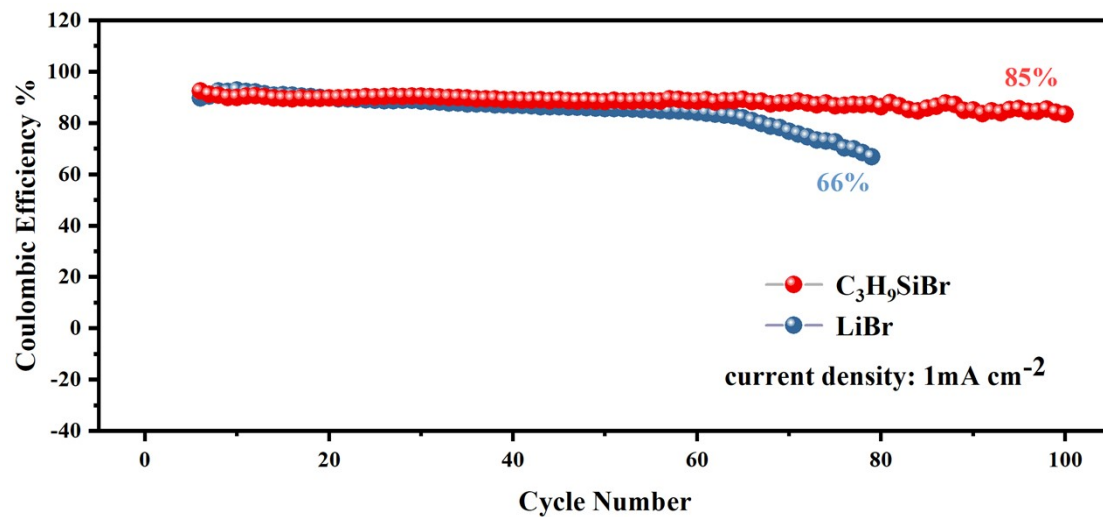

**Fig. S10** The comparison of coulombic efficiency of C<sub>3</sub>H<sub>9</sub>SiBr or LiBr- containing

Li | Cu cells

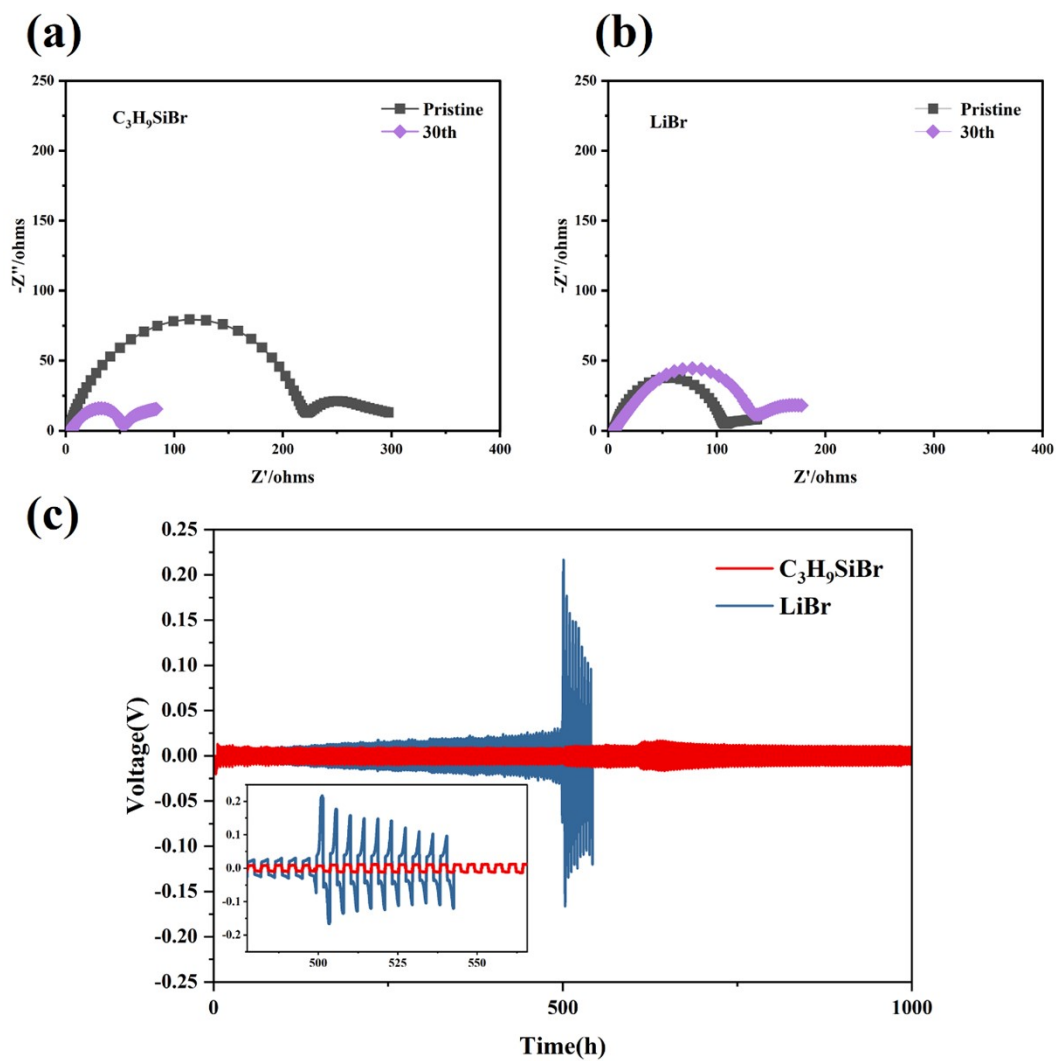

**Fig. S11** EIS spectra for (a)  $C_3H_9SiBr$  (b) LiBr. (c) Electrochemical performance of Li | Li symmetric batteries.



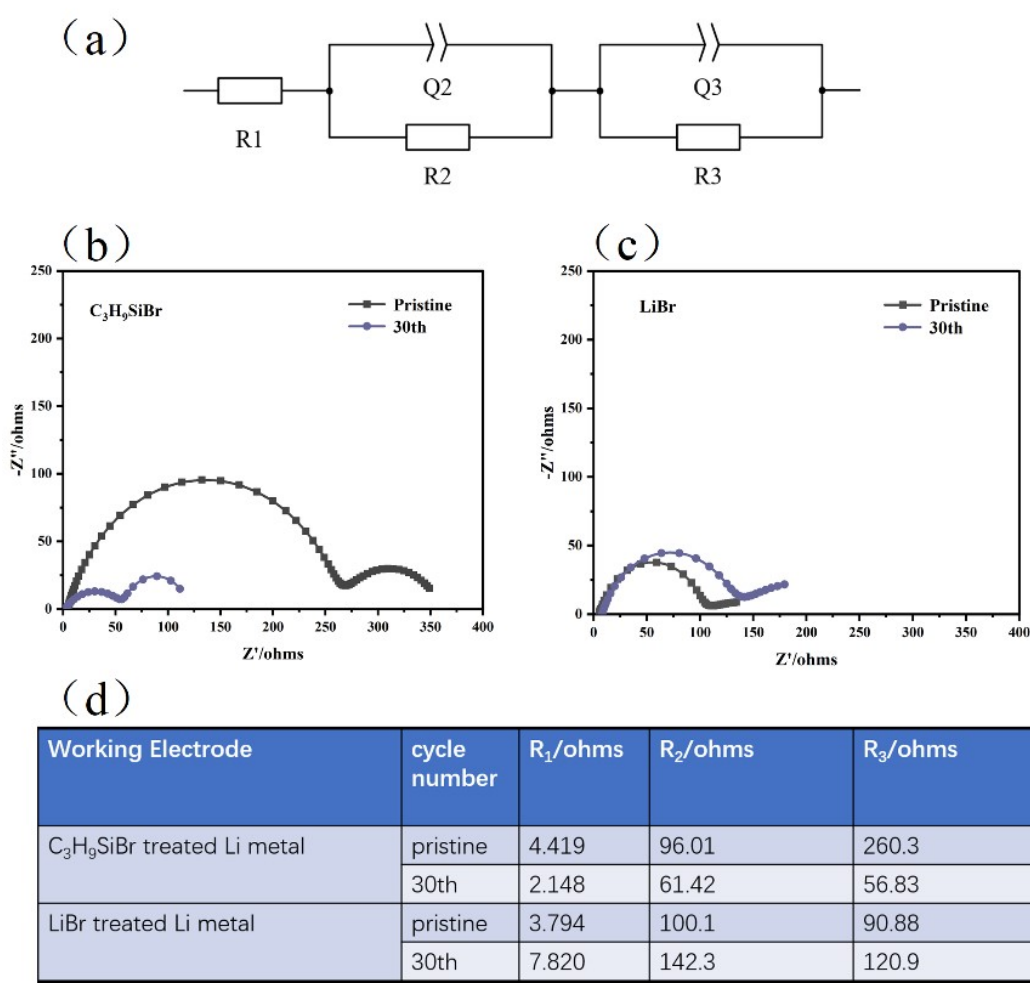

**Fig. S12** EIS analysis corresponding to Fig. S11. EIS analysis with (a) equivalent circuit model (b) Nyquist plots of fitted results of C<sub>3</sub>H<sub>9</sub>SiBr-containing Li | Li symmetric batteries, (c) Nyquist plots of fitted results of LiBr-containing Li | Li symmetric batteries, (d) fitting parameters.

Two semicircles are exhibited in the C<sub>3</sub>H<sub>9</sub>SiBr-containing batteries. It is worth pointing out that the low-frequency semicircle appears to indicate the existence of a protective SEI layer on lithium metal electrodes.<sup>4</sup> Meanwhile, in the 30<sup>th</sup> cycle, C<sub>3</sub>H<sub>9</sub>SiBr-containing batteries have a smaller charge-transfer resistance of 61.42 ohms than the LiBr-containing batteries (142.3 ohms), showing that the SEI film formed on the lithium metal electrodes is high ion-conductivity. From the fitting EIS analysis, it is further proved that the SEI layer has low interface impedance and high ion conductivity.

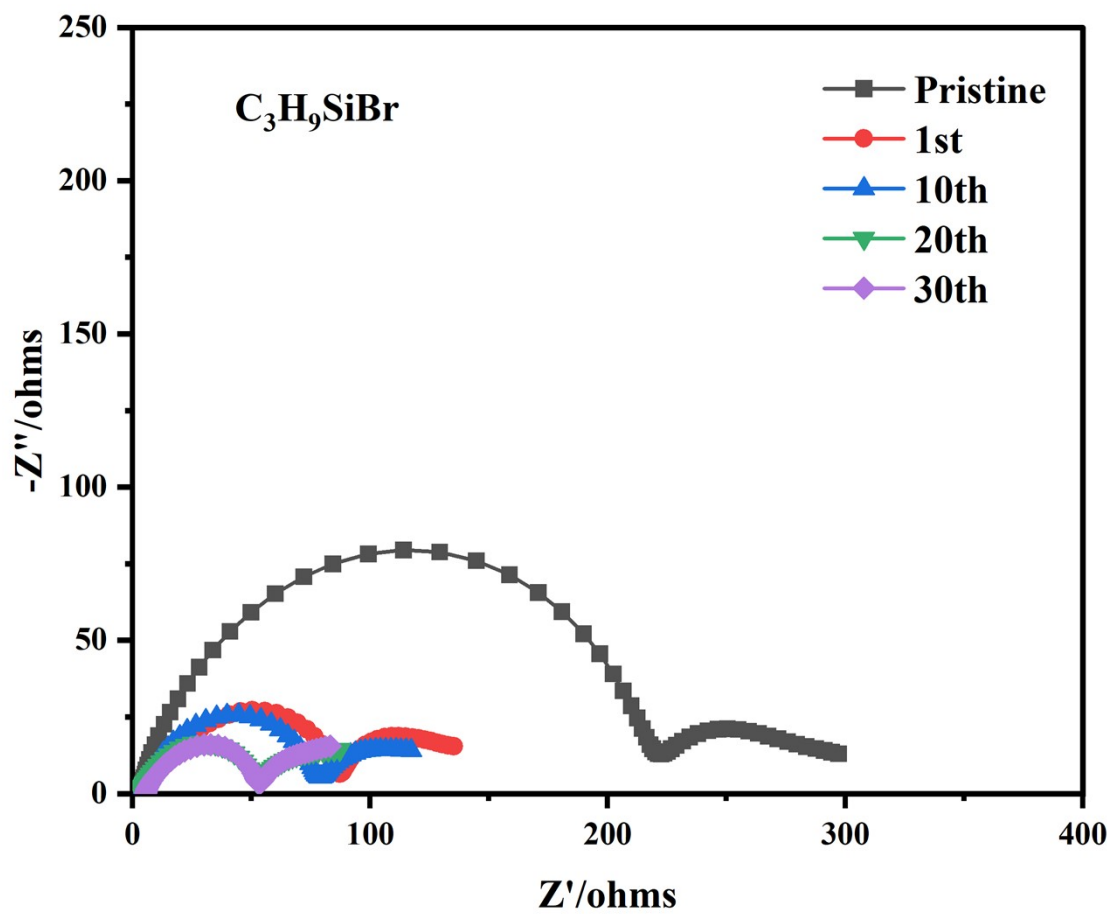

Fig. S13 The change of impedance for Li | Li symmetric batteries with  $C_3H_9SiBr$ .

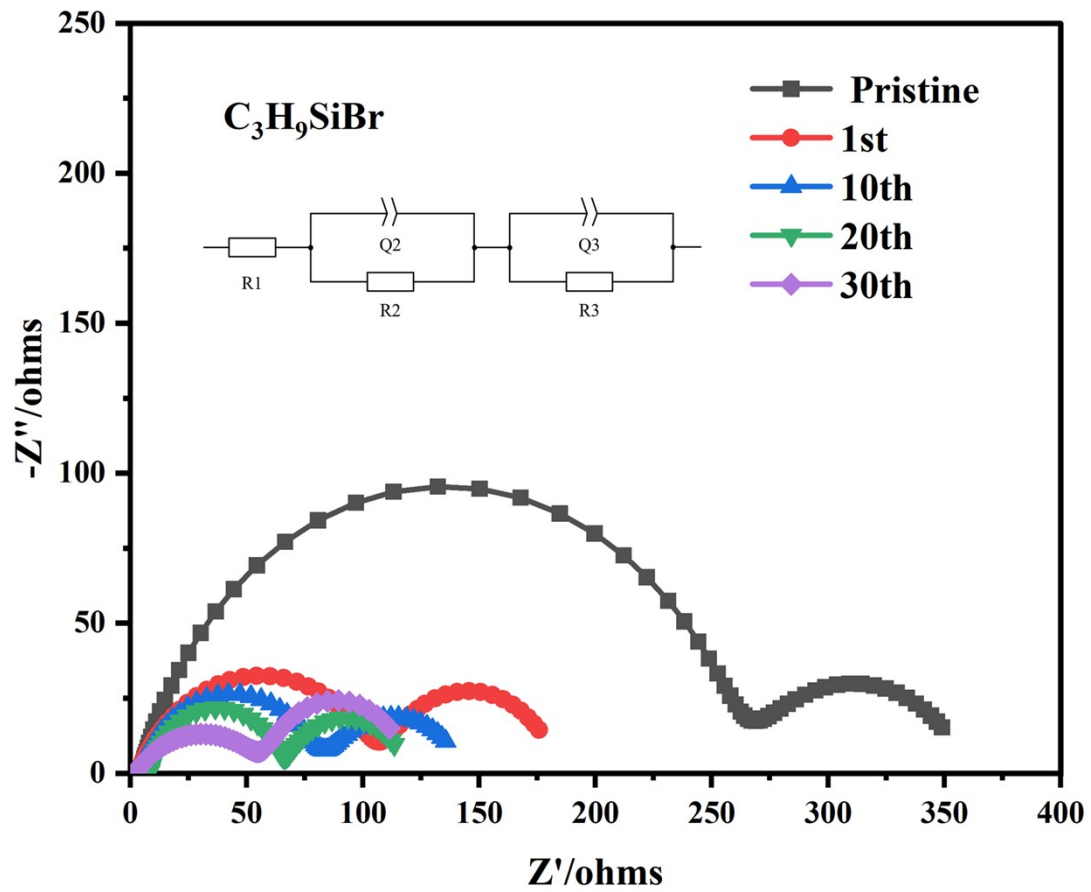

Fig. S14 EIS analysis corresponding to Fig. S13.

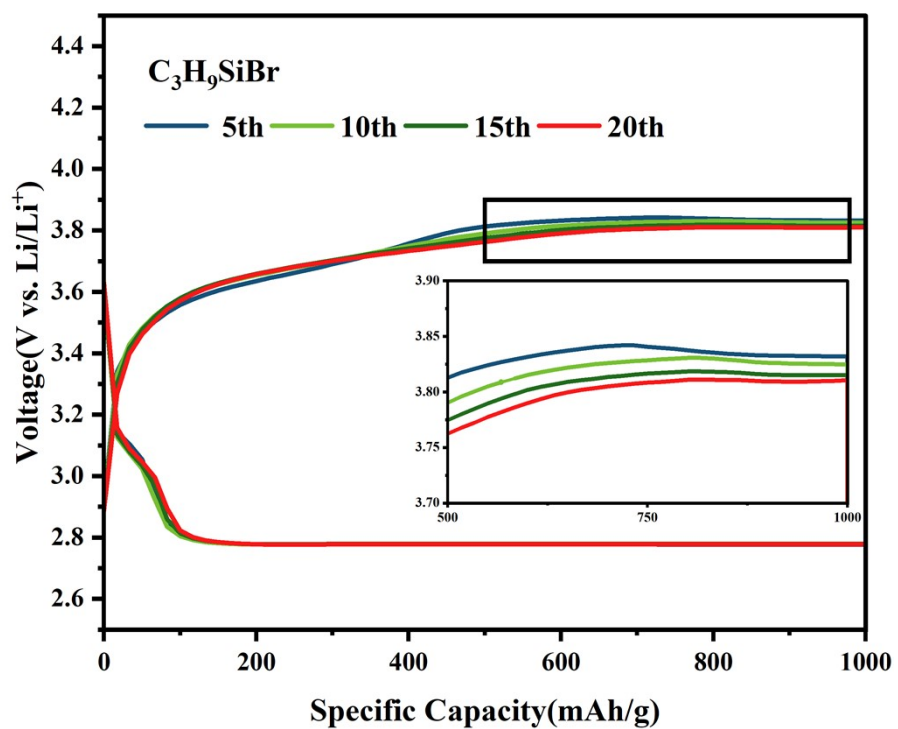

**Fig. S15** Galvanostatic discharge/charge curves of the first 20 cycles at 1000 mA/g.

## References

1. T. Zhang, K. Liao, P. He and H. Zhou, *Energy & Environmental Science*, 2016, **9**, 1024-1030.
2. Y. N. Li, F. L. Jiang, Z. Sun, O. Yamamoto, N. Imanishi and T. Zhang, *ACS Appl. Mater. Interfaces*, 2021, **13**, 16437-16444.
3. X. P. Zhang, Y. Y. Sun, Z. Sun, C. S. Yang and T. Zhang, *Nat Commun*, 2019, **10**, 3543.
4. T. S. Ong and H. Yang, *Electrochemical and Solid State Letters*, 2001, **4**, A89-A92.
